# Supplementary material for: Proteogenomic landscape of squamous cell lung cancer
Source: PubMed Central journal article supplement (PMC6687710; doi:10.1038/s41467-019-11452-x), 2019-08-08
Supplement: 41467_2019_11452_MOESM3_ESM.pdf [file 41467_2019_11452_MOESM3_ESM.pdf]

## **Description of Additional Supplementary Files**

File Name: Supplementary Data 1  
Description: Clinical and pathology.

File Name: Supplementary Data 2  
Description: Targeted exome sequencing and copy number variation.

File Name: Supplementary Data 3  
Description: Proteomics.

File Name: Supplementary Data 4  
Description: RNAseq, ESTIMATE, and CIBERSORT.

File Name: Supplementary Data 5  
Description: Association tests and tables.

File Name: Supplementary Data 6  
Description: Correlation results.

File Name: Supplementary Data 7  
Description: Proteomics differential expression.

File Name: Supplementary Data 8  
Description: Enrichr GO pathway enrichment.

File Name: Supplementary Data 9  
Description: MSigDB pathway enrichment.

File Name: Supplementary Data 10  
Description: Project DRIVE results.
